# Supplementary material for: A first-principles study on atomic-scale pore design of microporous carbon electrodes for lithium-ion batteries
Source: Royal Society of Chemistry journal article supplement (doi:10.1039/d2na00621a), 2022-01-01
Supplement: d2na00621a1.pdf [file d2na00621a1.pdf]

*Electronic Supplementary Information*

A First-Principles Study on Atomic-Scale Pore  
Design of Microporous Carbon Electrodes for  
Lithium-Ion Batteries†

Young Chul Lee and Sung Chul Jung\*

Department of Physics, Pukyong National University, Busan 48513, Republic of Korea

\*Corresponding author

Email: [scjung@pknu.ac.kr](mailto:scjung@pknu.ac.kr) (S. C. Jung)

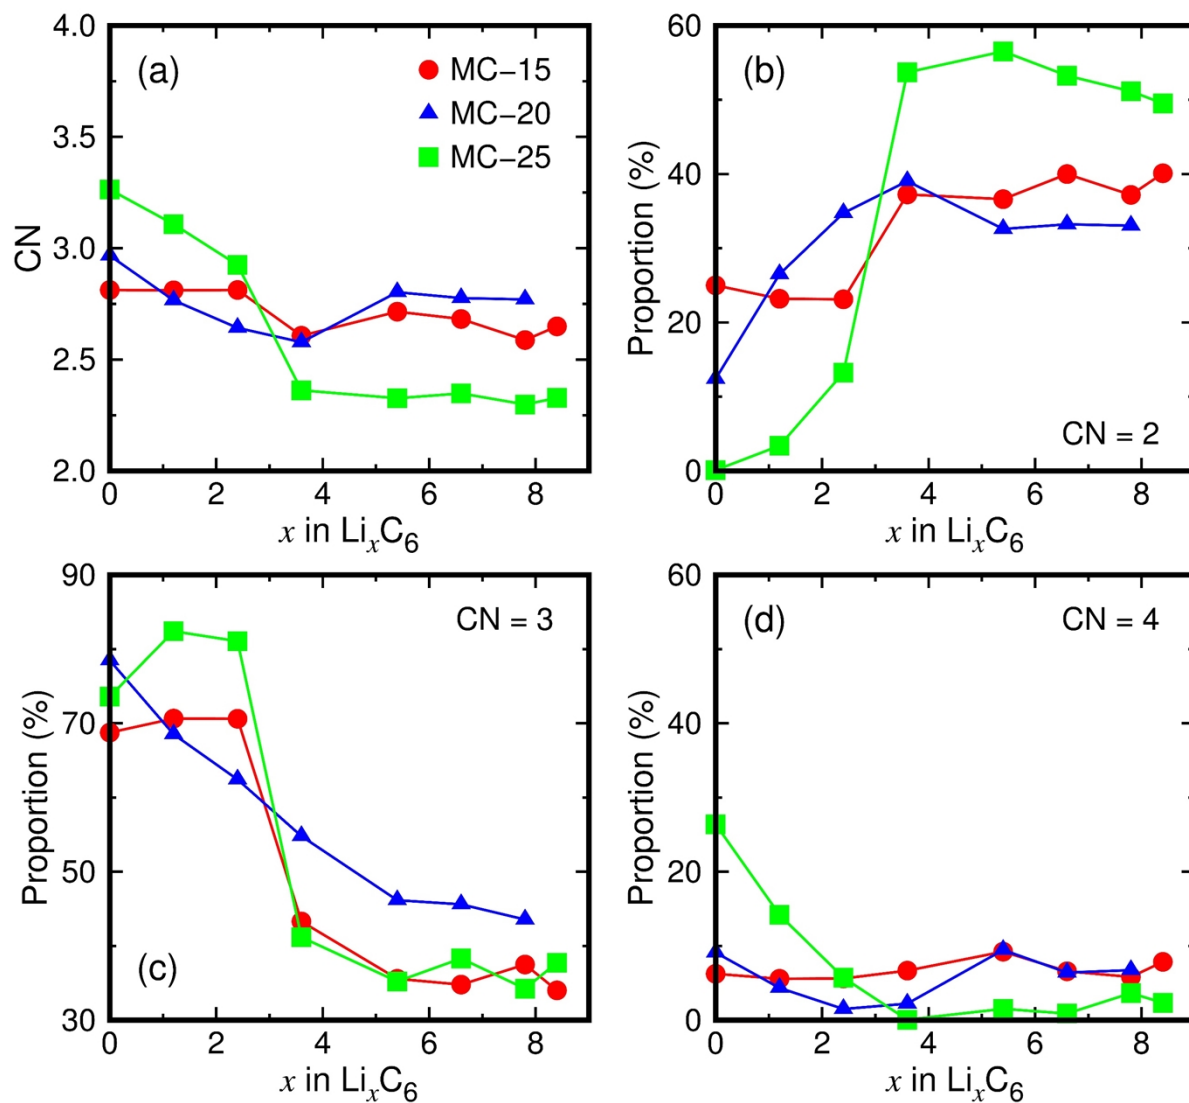

**Fig. S1** (a) Average coordination numbers of carbon atoms ( $CN_{C-C}$ ) and (b–d) proportions of  $CN_{C-C} = 2, 3,$  and  $4$  in lithiated microporous carbon structures with Li atoms removed.  $CN_{\alpha-\beta}$  represents the number of  $\beta$  atoms around an  $\alpha$  atom. The atomic bond is connected when the C–C distance is within  $1.9 \text{ \AA}$ .

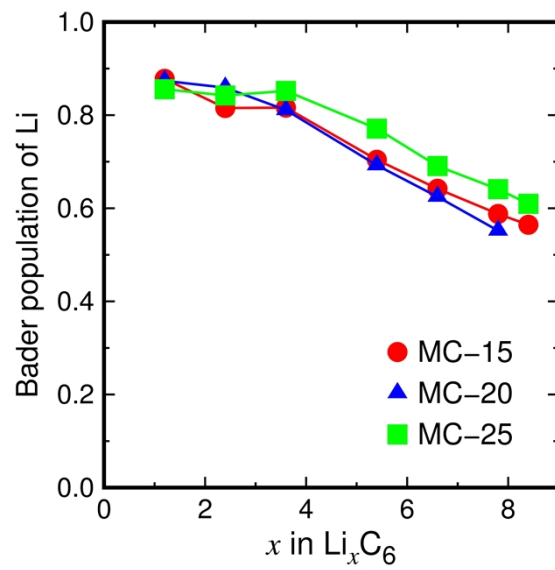

**Fig. S2** Average Bader populations of Li in lithiated MC-15, MC-20, and MC-25 structures.

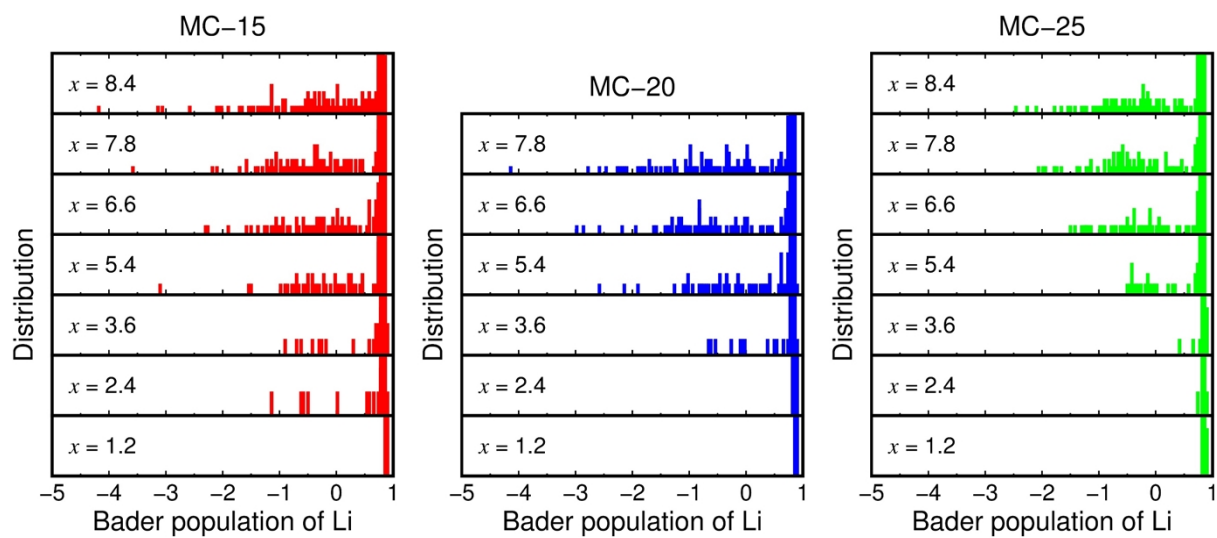

**Fig. S3** Distribution histograms of the Bader populations of Li in lithiated MC-15, MC-20, and MC-25 structures.

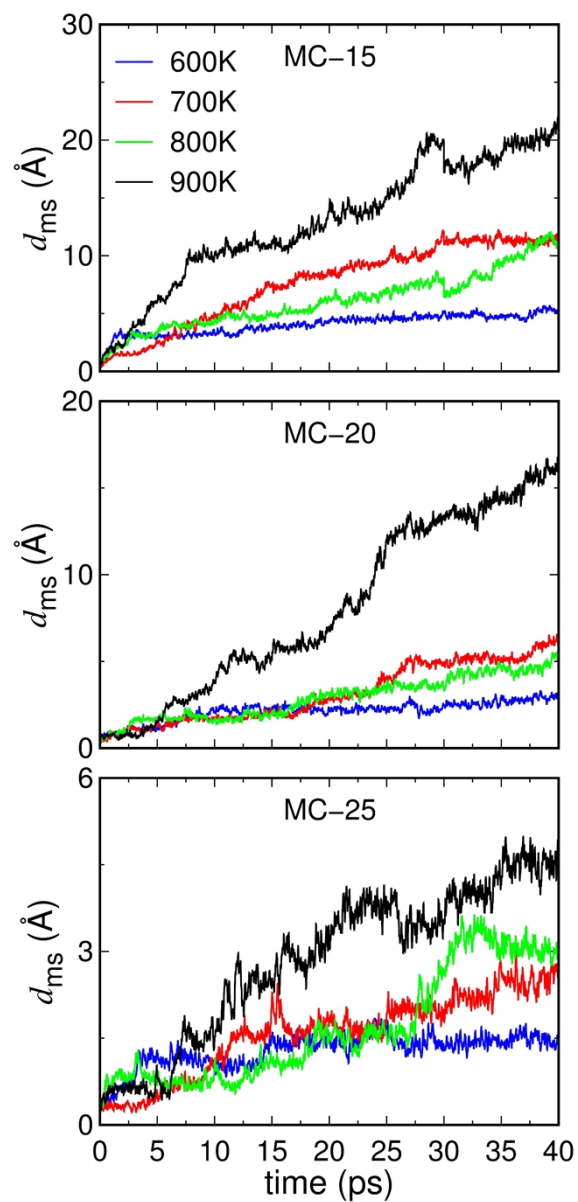

**Fig. S4** Mean-square displacements ( $d_{ms}$ ) of Li atoms in the partially lithiated MC-15, MC-20, and MC-25 ( $\text{Li}_{2.4}\text{C}_6$ ) structures.

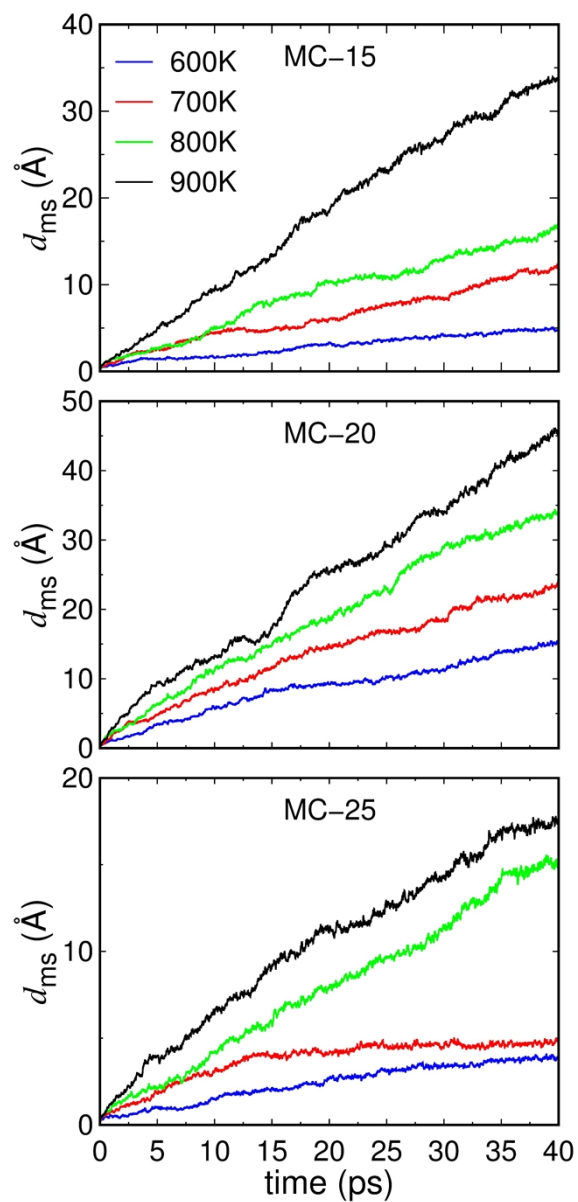

**Fig. S5** Mean-square displacements ( $d_{ms}$ ) of Li atoms in the fully lithiated MC-15 ( $\text{Li}_{8.4}\text{C}_6$ ), MC-20 ( $\text{Li}_{7.8}\text{C}_6$ ), and MC-25 ( $\text{Li}_{8.4}\text{C}_6$ ) structures.
